# Supplementary material for: Retracted Article: Divergent synthesis of 5-substituted pyrimidine 2′-deoxynucleosides and their incorporation into oligodeoxynucleotides for the survey of uracil DNA glycosylases
Source: Royal Society of Chemistry journal article supplement (doi:10.1039/d0sc04161k), 2020-01-01
Supplement: d0sc04161k1.pdf [file d0sc04161k1.pdf]

## Supporting Information

### **Divergent Synthesis of 5-Substituted Pyrimidine 2'-Deoxynucleosides and Their Incorporation into Oligodeoxynucleotides for the Survey of Uracil DNA Glycosylases**

Ai Tran<sup>†</sup>, Song Zheng<sup>†</sup>, Dawanna S. White<sup>†</sup>, Alyson M. Curry<sup>†</sup>, Yana Cen<sup>‡, #, \*</sup>

<sup>†</sup>*Department of Pharmaceutical Sciences, Albany College of Pharmacy and Health Sciences,  
Colchester, VT 05446*

<sup>‡</sup>*Department of Medicinal Chemistry, Virginia Commonwealth University, Richmond, VA 23219*

<sup>#</sup>*Institute for Structural Biology, Drug Discovery and Development, Virginia Commonwealth  
University, Richmond, VA 23219*

\*Correspondence: [ceny2@vcu.edu](mailto:ceny2@vcu.edu), phone: 804-828-7405

### Synthesis of 1

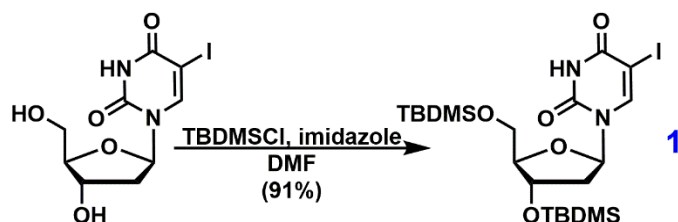

To a solution of 5-iodo-2'-deoxyuridine (1 g, 2.82 mmol) in 10 mL of DMF were added TBDMSCl (1.275 g, 8.46 mmol) and imidazole (861 mg, 12.66 mmol). The reaction mixture was stirred at r.t. until completion. Solvent was evaporated *in vacuo*. Residue was redissolved in ethyl acetate, washed with water, sat. NaHCO<sub>3</sub>, brine and dried over anhydrous Na<sub>2</sub>SO<sub>4</sub>. Solvent was removed *in vacuo*. Crude product was purified by column chromatography (hexanes:ethyl acetate 4:1) to afford **1**<sup>1</sup> (1.49 g, 2.56 mmol, 91% yield) as a white foam. <sup>1</sup>H NMR (300 MHz, CDCl<sub>3</sub>) δ: 8.21 (s, 1H), 8.07 (s, 1H), 6.25 (t, *J* = 6.4 Hz, 1H), 4.38 (m, 1H), 3.97 (m, 1H), 3.86 (m, 1H), 3.74 (m, 1H), 2.28 (m, 1H), 1.96 (m, 1H), 0.93 (s, 9H), 0.88 (s, 9H), 0.13 (s, 6H), 0.06 (s, 6H). HRMS (*m/z*): calculated for C<sub>21</sub>H<sub>40</sub>IN<sub>2</sub>O<sub>5</sub>Si<sub>2</sub> (M+H): 583.1515; found: 583.1523.

### Synthesis of 2

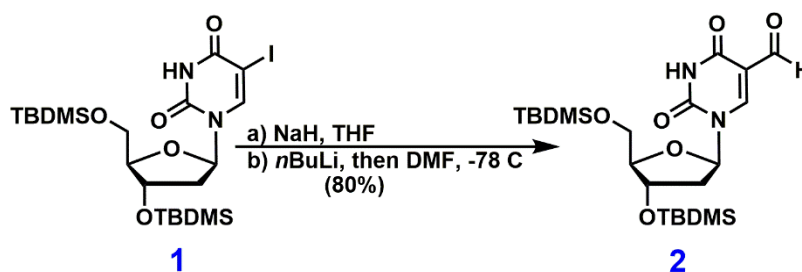

To a solution of **1** (420 mg, 0.722 mmol) in 3 mL of THF was added NaH (26 mg, 1.083 mmol) at r.t. The solution was stirred for another 30 min before it was cooled down to -78°C and *n*BuLi (1.35 mL, 2.17 mmol) was added. After 15 min, DMF (316 mg, 4.332 mmol) was then added dropwise. The reaction mixture was kept at -78°C for another hour before it was quenched with the addition of NH<sub>4</sub>Cl solution. Organic layer was washed with brine and dried over Na<sub>2</sub>SO<sub>4</sub>. Solvent was removed *in vacuo*. Crude product was purified by column chromatography (hexanes:ethyl acetate 5:1) to afford **2**<sup>2</sup> (280 mg, 0.579 mmol, 80% yield) as a white foam. <sup>1</sup>H NMR



and the reaction mixture was stirred at r.t. for overnight. MeOH (1 mL) was added and the reaction mixture was stirred for an additional 10 min, and then evaporated to dryness. The residue was redissolved in CH<sub>2</sub>Cl<sub>2</sub>, washed with water, sat. NaHCO<sub>3</sub>, and dried over Na<sub>2</sub>SO<sub>4</sub>. Crude product was purified by column chromatography (CH<sub>2</sub>Cl<sub>2</sub> with 2% methanol) to afford **4** (238 mg, 0.43 mmol, 79% yield) as a white foam. <sup>1</sup>H NMR (300 MHz, CDCl<sub>3</sub>) δ: 9.65 (s, 1H), 8.42 (s, 1H), 7.24 (m, 2H), 7.22 (m, 7H), 6.80 (dd, *J* = 0.84, 9 Hz, 4H), 6.15 (t, *J* = 6.6 Hz, 1H), 4.42 (m, 1H), 4.10 (m, 1H), 3.73 (s, 6H), 3.38 (m, 2H), 2.59 (m, 1H), 2.25 (m, 1H). <sup>13</sup>C NMR (75 MHz, CDCl<sub>3</sub>) δ: 185.3, 161.6, 158.6, 149.3, 145.8, 144.3, 135.4, 135.3, 130.0, 127.9, 127.0, 113.3, 111.1, 87.06, 87.00, 86.8, 72.4, 63.4, 55.2, 41.5. HRMS (*m/z*): calculated for C<sub>31</sub>H<sub>31</sub>N<sub>2</sub>O<sub>8</sub> (M+H): 559.2075; found: 559.2078.

#### Synthesis of 5-fodU-CE phosphoramidite

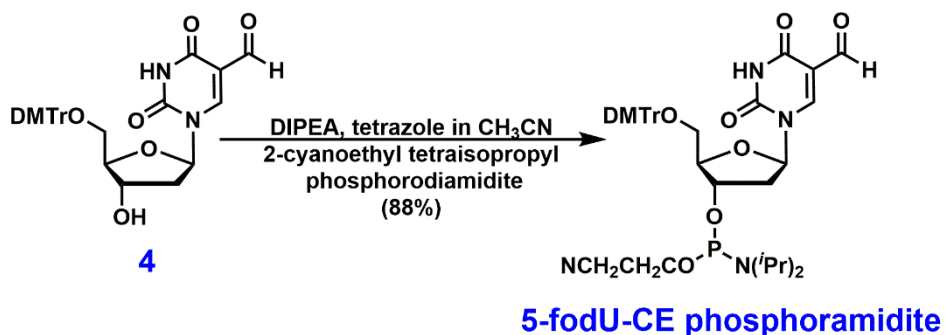

To a solution of **4** (40 mg, 0.072 mmol) in 1 mL of anhydrous CH<sub>3</sub>CN were added diisopropylethylamine (28 mg, 0.215 mmol), tetrazole in CH<sub>3</sub>CN (0.24 mL, 0.108 mmol) and 2-cyanoethyl *N,N,N',N'*-tetraisopropylphosphordiamidite (33 mg, 0.108 mmol). The reaction was kept at r.t. and monitored by TLC. Ten minutes later, precipitate appeared. Upon completion, the reaction was quenched with the addition of 0.5 mL of absolute ethanol. Reaction was diluted with ethyl acetate with 1% triethylamine, washed with 5% NaHCO<sub>3</sub>, water, brine, and dried over anhydrous Na<sub>2</sub>SO<sub>4</sub>. Solvent was removed under reduced pressure. Crude product was purified by column chromatography (CH<sub>2</sub>Cl<sub>2</sub> with 2% methanol and 1% triethylamine) to afford 5-fodU-CE

phosphoramidite (48 mg, 0.063 mmol, 88% yield) as a white foam.  $^1\text{H}$  NMR (300 MHz,  $\text{CDCl}_3$ )  $\delta$ : 9.64 (d,  $J = 3.34$  Hz, 1H), 8.46 (s, 0.53H), 8.42 (s, 0.47H), 7.99 (s, 1H), 7.21 (m, 10H), 6.81 (m, 4H), 6.14 (m, 1H), 5.86 (s, 1H), 4.49 (m, 1H), 4.15 (m, 1H), 3.76 (s, 6H), 3.61 (m, 8H), 2.72 (m, 2H), 2.58 (m, 1H), 2.42 (m, 1H), 1.23 (m, 12H).  $^{13}\text{C}$  NMR (75 MHz,  $\text{CD}_3\text{OD}$ )  $\delta$ : 187.5, 163.7, 160.4, 151.1, 149.0, 146.2, 137.1, 136.9, 131.53, 131.50, 129.4, 129.0, 128.1, 114.4, 112.2, 88.9, 88.8, 88.3, 72.7, 64.8, 55.9, 55.0, 41.7, 26.7, 26.4, 19.4, 19.0.  $^{31}\text{P}$  NMR (120 MHz,  $\text{CDCl}_3$ )  $\delta$ : 149.2, 148.8. HRMS ( $m/z$ ): calculated for  $\text{C}_{40}\text{H}_{48}\text{N}_4\text{O}_9\text{P}$  ( $\text{M}+\text{H}$ ): 759.3153; found: 759.3158.

### Synthesis of 5

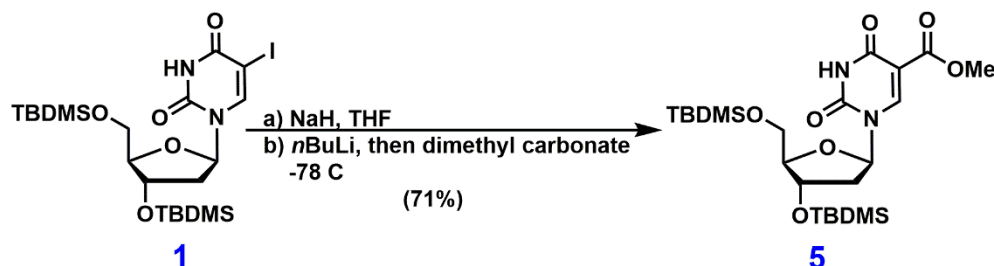

To a solution of **1** (0.6 g, 1.03 mmol) in 4 mL of THF was added NaH (37 mg, 1.55 mmol) at r.t. The solution was stirred for another 30 min before it was cooled down to  $-78^\circ\text{C}$  and  $n\text{BuLi}$  (1.93 mL, 3.09 mmol) was added. After 15 min, dimethyl carbonate (556 mg, 6.18 mmol) was then added dropwise. The reaction mixture was kept at  $-78^\circ\text{C}$  for another hour before it was quenched with the addition of  $\text{NH}_4\text{Cl}$  solution. Organic layer was washed with brine and dried over  $\text{Na}_2\text{SO}_4$ . Solvent was removed *in vacuo*. Crude product was purified by column chromatography (hexanes:ethyl acetate 3:1) to afford **5**<sup>1</sup> (375 mg, 0.73 mmol, 71% yield) as a white solid.  $^1\text{H}$  NMR (300 MHz,  $\text{CDCl}_3$ )  $\delta$ : 9.37 (broad, 1H), 8.48 (s, 1H), 6.15 (t,  $J = 6.2$  Hz, 1H), 4.36 (m, 1H), 4.25 (m, 2H), 3.99 (m, 1H), 3.70 (s, 3H), 2.39 (m, 1H), 2.03 (m, 1H), 0.85 (s, 9H), 0.83 (s, 9H), 0.04 (s, 12H). HRMS ( $m/z$ ): calculated for  $\text{C}_{23}\text{H}_{43}\text{N}_2\text{O}_7\text{Si}_2$  ( $\text{M}+\text{H}$ ): 515.2603; found: 515.2609.

### Synthesis of 6

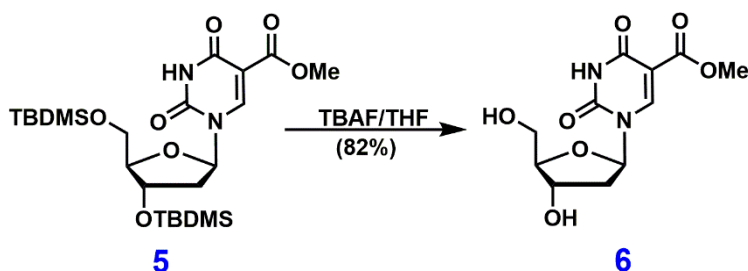

To a solution of **5** (375 mg, 0.73 mmol) in 1 mL of THF was added TBAF (1 M in THF, 1.825 mmol). The reaction was kept at r.t. and monitored by TLC. Upon completion (about 1h), solvent was removed under reduced pressure. Crude product was purified by column chromatography ( $\text{CH}_2\text{Cl}_2$  with 8% methanol) to afford **6**<sup>3</sup> (171 mg, 0.60 mmol, 82% yield) as a white solid.  $^1\text{H}$  NMR (300 MHz, DMSO)  $\delta$ : 8.81 (s, 1H), 6.08 (t,  $J = 6.3$  Hz, 1H), 5.23 (br, 1H), 5.03 (br, 1H), 4.23 (m, 1H), 3.83 (m, 1H), 3.68 (s, 3H), 3.58 (m, 2H), 2.20 (m, 2H). HRMS ( $m/z$ ): calculated for  $\text{C}_{11}\text{H}_{15}\text{N}_2\text{O}_7$  (M+H): 287.0874; found: 287.0871.

#### Synthesis of 7

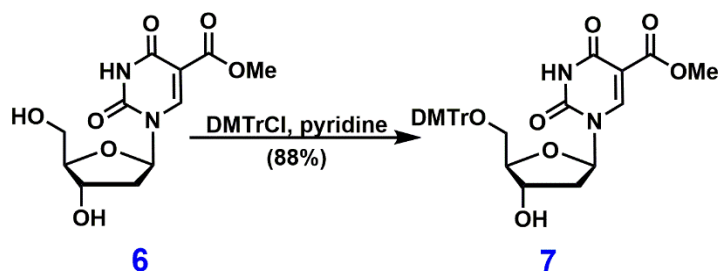

To a solution of **6** (250 mg, 0.874 mmol) in 20 mL of anhydrous pyridine was added 4,4'-dimethoxytrityl chloride (355 mg, 1.049 mmol) under argon atmosphere. The mixture was stirred overnight at room temperature before it was quenched with the addition of 1 mL of methanol. Solvent was evaporated under reduced pressure. The residue was redissolved in  $\text{CH}_2\text{Cl}_2$ , washed with 5%  $\text{NaHCO}_3$ , water, brine and dried over anhydrous  $\text{Na}_2\text{SO}_4$ . Solvent was removed *in vacuo*. Crude product was purified by column chromatography ( $\text{CH}_2\text{Cl}_2$  with 3% methanol) to afford **7**<sup>4</sup> (450 mg, 0.765 mmol, 88% yield) as a white foam.  $^1\text{H}$  NMR (300 MHz,  $\text{CD}_3\text{COCD}_3$ )  $\delta$ : 8.61 (s,

1H), 7.51 (m, 2H), 7.31 (m, 7H), 6.88 (m, 4H), 6.24 (t,  $J = 6.8$  Hz, 1H), 4.47 (m, 1H), 4.11 (m, 1H), 3.79 (s, 6H), 3.42 (dd,  $J = 3.3, 10.5$  Hz, 1H), 3.33 (dd,  $J = 4.3, 10.5$  Hz, 1H), 3.31 (s, 3H), 2.37 (m, 2H). HRMS ( $m/z$ ): calculated for  $C_{32}H_{33}N_2O_9$  ( $M+H$ ): 589.2181; found: 589.2189.

#### Synthesis of 5-cadU-CE phosphoramidite

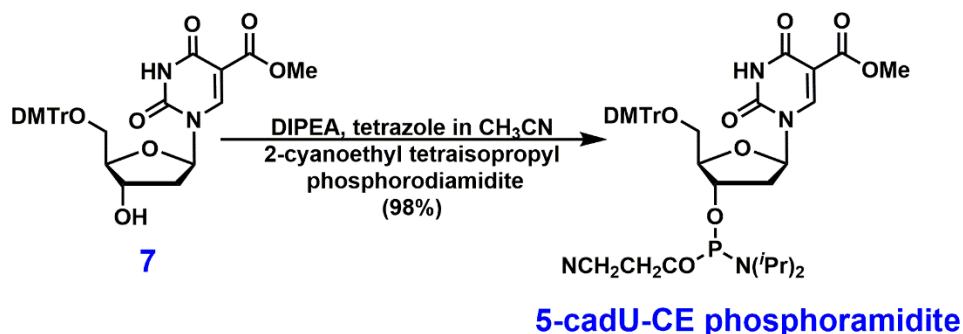

To a solution of **7** (80 mg, 0.136 mmol) in 2 mL of anhydrous  $\text{CH}_3\text{CN}$  were added diisopropylethylamine (53 mg, 0.408 mmol), tetrazole in  $\text{CH}_3\text{CN}$  (0.45 mL, 0.204 mmol) and 2-cyanoethyl  $N,N,N',N'$ -tetraisopropylphosphordiamidite (61 mg, 0.204 mmol). The reaction was kept at room temperature and monitored by TLC. Ten minutes later, a white precipitate appeared. Upon completion, the reaction was quenched with the addition of 0.5 mL of absolute ethanol. Reaction was diluted with ethyl acetate with 1% triethylamine, washed with 5%  $\text{NaHCO}_3$ , water, brine, and dried over anhydrous  $\text{Na}_2\text{SO}_4$ . Solvent was removed under reduced pressure, crude product was purified by column chromatography ( $\text{CH}_2\text{Cl}_2$  with 1.5% methanol and 1% triethylamine) to afford 5-cadU-CE phosphoramidite<sup>4</sup> (105 mg, 0.133 mmol, 98% yield) as a white foam.  $^1\text{H}$  NMR (300 MHz,  $\text{CDCl}_3$ )  $\delta$ : 8.69 (s, 0.52H), 8.65 (s, 0.48H), 7.39 (m, 2H), 7.23 (m, 7H), 6.79 (m, 4H), 6.22 (m, 1H), 4.48 (m, 1H), 4.20 (m, 1H), 3.74 (s, 6H), 3.54 (m, 5H), 3.21 (m, 1H), 3.18 (s, 1.5H), 3.17 (s, 1.5H), 2.72 (m, 2H), 2.57 (m, 1H), 2.22 (m, 1H), 1.23 (m, 12H).  $^{31}\text{P}$  NMR (120 MHz,  $\text{CDCl}_3$ )  $\delta$ : 149.2, 148.6. HRMS ( $m/z$ ): calculated for  $C_{41}H_{50}N_4O_{10}P$  ( $M+H$ ): 789.3259; found: 789.3264.

### Synthesis of 8

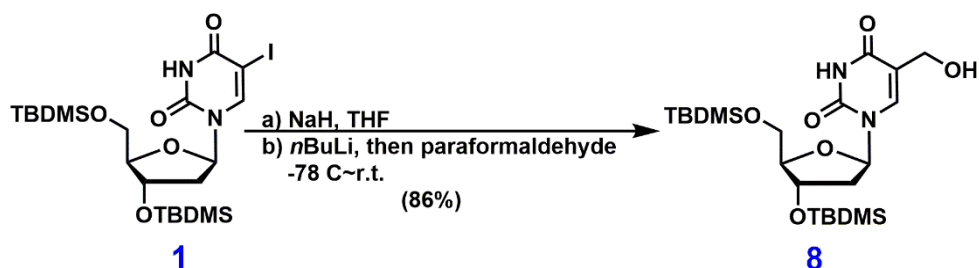

To a solution of **1** (0.4 g, 0.687 mmol) in 3 mL of THF was added NaH (25 mg, 1.03 mmol) at r.t. The solution was stirred for another 30 min before it was cooled down to  $-78^\circ\text{C}$  and *n*BuLi (1.29 mL, 2.06 mmol) was added. After 15 min, paraformaldehyde (124 mg, 4.12 mmol) was added. The reaction mixture was then allowed to slowly warm to r.t. and stir overnight before it was quenched with the addition of  $\text{NH}_4\text{Cl}$  solution. Organic layer was washed with brine and dried over  $\text{Na}_2\text{SO}_4$ . Solvent was removed *in vacuo*. Crude product was purified by column chromatography (hexanes:ethyl acetate 3:1) to afford **8** (287 mg, 0.59 mmol, 86% yield) as a white solid.  $^1\text{H}$  NMR (300 MHz,  $\text{CD}_3\text{OD}$ )  $\delta$ : 7.68 (s, 1H), 6.25 (dd,  $J = 5.9, 7.9$  Hz, 1H), 4.48 (m, 1H), 4.31 (d,  $J = 0.6$  Hz, 2H), 3.92 (m, 1H), 3.80 (m, 2H), 2.20 (m, 1H), 2.15 (m, 1H), 0.93 (s, 9H), 0.92 (s, 9H), 0.12 (s, 12H).  $^{13}\text{C}$  NMR (75 MHz,  $\text{CD}_3\text{OD}$ )  $\delta$ : 165.1, 152.3, 138.7, 115.5, 89.4, 86.6, 74.1, 64.4, 58.0, 41.7, 26.7, 26.4, 19.4, 19.0, -4.3, -4.4, -5.05, -5.12. HRMS ( $m/z$ ): calculated for  $\text{C}_{22}\text{H}_{43}\text{N}_2\text{O}_6\text{Si}_2$  ( $\text{M}+\text{H}$ ): 487.2654; found: 487.2655.

### Synthesis of 9

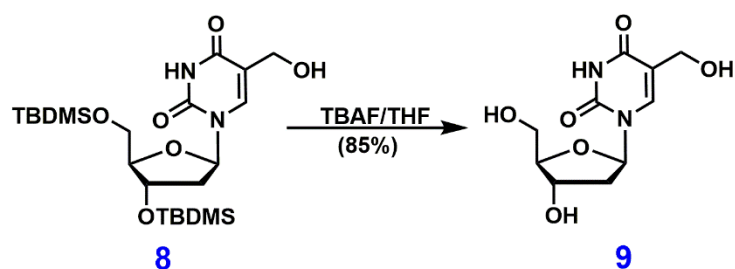

To a solution of **8** (87 mg, 0.18 mmol) in 1 mL of THF was added TBAF (1 M in THF, 0.45 mmol). The reaction was kept at r.t. and monitored by TLC. Upon completion (about 1h), solvent was

removed under reduced pressure. Crude product was purified by column chromatography (CH<sub>2</sub>Cl<sub>2</sub> with 15% methanol) to afford **9**<sup>5</sup> (39 mg, 0.151 mmol, 85% yield) as a white foam. <sup>1</sup>H NMR (300 MHz, CD<sub>3</sub>OD) δ: 7.96 (s, 1H), 6.29 (t, *J* = 7.0 Hz, 1H), 4.40 (m, 1H), 4.32 (s, 2H), 3.91 (m, 1H), 3.75 (m, 2H), 2.25 (m, 2H). <sup>13</sup>C NMR (75 MHz, CD<sub>3</sub>OD) δ: 165.3, 152.4, 139.6, 115.4, 89.0, 86.6, 72.4, 63.0, 58.1, 41.4. HRMS (*m/z*): calculated for C<sub>10</sub>H<sub>15</sub>N<sub>2</sub>O<sub>6</sub> (M+H): 259.0925; found: 259.0928.

#### Synthesis of 5-hmdU-CE phosphoramidite

5-hmdU-CE phosphoramidite was synthesized as described previously.<sup>5</sup>

#### Synthesis of **10**

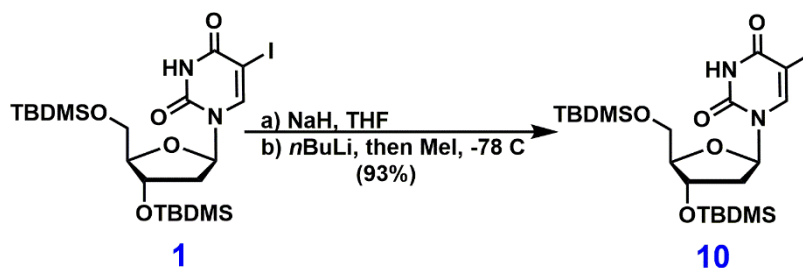

To a solution of **1** (1.49 g, 2.56 mmol) in 10 mL of THF was added NaH (92 mg, 3.84 mmol) at r.t. The solution was stirred for another 30 min before it was cooled down to -78°C and *n*BuLi (4.8 mL, 7.68 mmol) was added. After 15 min, methyl iodide (1.86 g, 12.8 mmol) was then added dropwise. The reaction mixture was kept at -78°C for another hour before it was quenched with the addition of NH<sub>4</sub>Cl solution. Organic layer was washed with brine and dried over Na<sub>2</sub>SO<sub>4</sub>. Solvent was removed *in vacuo*. Crude product was purified by column chromatography (hexanes:ethyl acetate 3:1) to afford **10**<sup>6</sup> (1.12 g, 2.38 mmol, 93% yield) as a white solid. <sup>1</sup>H NMR (300 MHz, CDCl<sub>3</sub>) δ: 8.03 (s, 1H), 7.45 (s, 1H), 6.31 (t, *J* = 6.3 Hz, 1H), 4.39 (m, 1H), 3.92 (m, 1H), 3.85 (d, *J* = 11.6 Hz, 1H), 3.74 (d, *J* = 11.6 Hz, 1H), 2.23 (m, 1H), 1.99 (m, 1H), 1.75 (s, 3H), 0.91 (s, 9H), 0.88 (s, 9H), 0.09 (s, 6H), 0.06 (s, 6H). HRMS (*m/z*): calculated for C<sub>22</sub>H<sub>43</sub>N<sub>2</sub>O<sub>5</sub>Si<sub>2</sub>

(M+H): 471.2705; found: 471.2707.

### Synthesis of 11

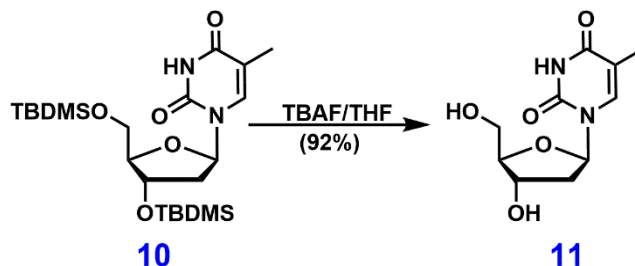

To a solution of **10** (638 mg, 1.36 mmol) in 2 mL of THF was added TBAF (1 M in THF, 3.4 mmol). The reaction was kept at r.t. and monitored by TLC. Upon completion (about 1h), solvent was removed under reduced pressure. Crude product was purified by column chromatography (CH<sub>2</sub>Cl<sub>2</sub> with 8~10% methanol) to afford **11**<sup>7</sup> (303 mg, 1.25 mmol, 92% yield) as a white foam. <sup>1</sup>H NMR (300 MHz, CD<sub>3</sub>OD)  $\delta$ : 7.80 (d,  $J$  = 1.1 Hz, 1H), 6.27 (t,  $J$  = 6.9 Hz, 1H), 4.38 (m, 1H), 3.89 (m, 1H), 3.75 (m, 2H), 2.21 (m, 2H), 1.87 (d,  $J$  = 1.1 Hz, 3H). HRMS ( $m/z$ ): calculated for C<sub>10</sub>H<sub>15</sub>N<sub>2</sub>O<sub>5</sub> (M+H): 243.0975; found: 243.0979.

### Synthesis of dT-CE phosphoramidite

dT-CE phosphoramidite was synthesized as described previously.<sup>8</sup>

### Synthesis of 12

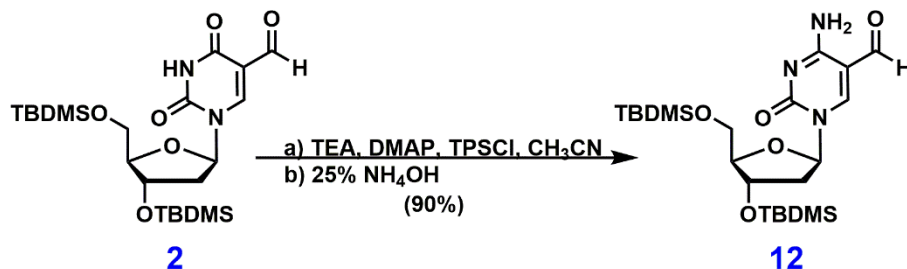

To a solution of **2** (212 mg, 0.44 mmol) in CH<sub>3</sub>CN (7 mL) were added TEA (141 mg, 1.39 mmol), DMAP (164 mg, 1.35 mmol) and TPSCI (409 mg, 1.35 mmol). The reaction was stirred at r.t. for 21 h before NH<sub>4</sub>OH (25%, 10 mL) was added. The reaction was kept stirring at r.t. for

another 1.5 h. Solvent was removed under vacuum. The residue was partitioned between water and ethyl acetate. The aqueous layer was extracted with ethyl acetate 3 times. Combined organic layer was washed with 5% NaHCO<sub>3</sub>, brine and dried over Na<sub>2</sub>SO<sub>4</sub>. Crude product was purified by column chromatography (CH<sub>2</sub>Cl<sub>2</sub> with 5% methanol) to afford **12**<sup>9</sup> (191 mg, 0.395 mmol, 90% yield) as a white solid. <sup>1</sup>H NMR (300 MHz, CD<sub>3</sub>OD) δ: 9.56 (s, 1H), 8.62 (s, 1H), 6.14 (t, *J* = 6.5 Hz, 1H), 4.46 (m, 1H), 4.10 (m, 1H), 3.90 (m, 2H), 2.55 (m, 1H), 2.15 (m, 1H), 0.93 (s, 9H), 0.90 (s, 9H), 0.131 (s, 3H), 0.125 (s, 3H), 0.11 (s, 6H). HRMS (*m/z*): calculated for C<sub>22</sub>H<sub>42</sub>N<sub>3</sub>O<sub>5</sub>Si<sub>2</sub> (M+H): 484.2658; found: 484.2663.

#### Synthesis of 13

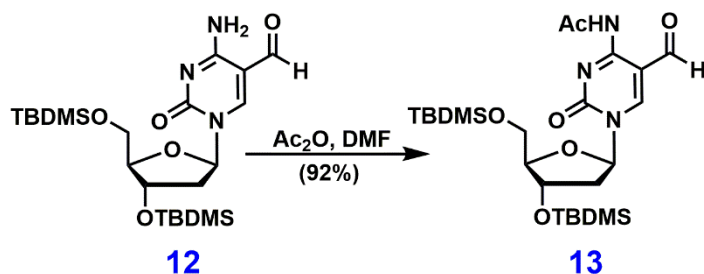

To a solution of **12** (60 mg, 0.124 mmol) in 1 mL of DMF was added Ac<sub>2</sub>O (15.2 mg, 0.15 mmol). The reaction mixture was stirred at r.t. overnight. MeOH (0.5 mL) was added to quench the reaction. After the mixture was stirred for additional 15 min, the solvents were removed under reduced pressure. The residue was purified by column chromatography (CH<sub>2</sub>Cl<sub>2</sub> with 2–4% methanol) to afford **13**<sup>10</sup> (60 mg, 0.114 mmol, 92% yield) as a white foam. <sup>1</sup>H NMR (300 MHz, CD<sub>3</sub>OD) δ: 9.58 (s, 1H), 8.83 (s, 1H), 6.15 (t, *J* = 6.7 Hz, 1H), 4.47 (m, 1H), 4.15 (m, 1H), 3.93 (m, 2H), 2.63 (m, 1H), 2.59 (s, 3H), 2.22 (m, 1H), 0.93 (s, 9H), 0.90 (s, 9H), 0.13 (s, 6H), 0.11 (s, 6H). HRMS (*m/z*): calculated for C<sub>24</sub>H<sub>44</sub>N<sub>3</sub>O<sub>6</sub>Si<sub>2</sub> (M+H): 526.2763; found: 526.2766.

#### Synthesis of 14

To a solution of **13** (28 mg, 0.053 mmol) in 0.5 mL of THF was added TBAF (1 M in THF,

0.133 mmol). The reaction was kept at r.t. and monitored by TLC. Upon completion (about 1h), solvent was removed under reduced pressure. Crude product was purified by column chromatography (CH<sub>2</sub>Cl<sub>2</sub> with 10% methanol) to afford **14**<sup>10</sup> (13 mg, 0.043 mmol, 81% yield) as a white foam. <sup>1</sup>H NMR (300 MHz, CD<sub>3</sub>OD)  $\delta$ : 9.58 (s, 1H), 9.06 (s, 1H), 6.23 (t, *J* = 5.9 Hz, 1H), 4.44 (m, 1H), 4.06 (m, 1H), 3.95 (dd, *J* = 3.0, 12.1 Hz, 1H), 3.82 (dd, *J* = 3.5, 12.1 Hz, 1H), 2.49 (m, 1H), 2.39 (s, 3H), 2.29 (m, 1H). HRMS (*m/z*): calculated for C<sub>12</sub>H<sub>16</sub>N<sub>3</sub>O<sub>6</sub> (M+H): 298.1034; found: 298.1038.

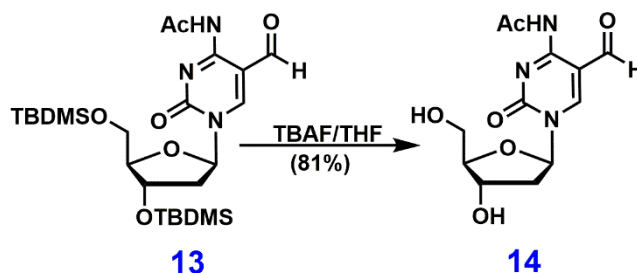

#### Synthesis of 5-fodC-CE phosphoramidite

5-fodC-CE phosphoramidite was synthesized as described previously.<sup>10</sup>

#### Synthesis of 15

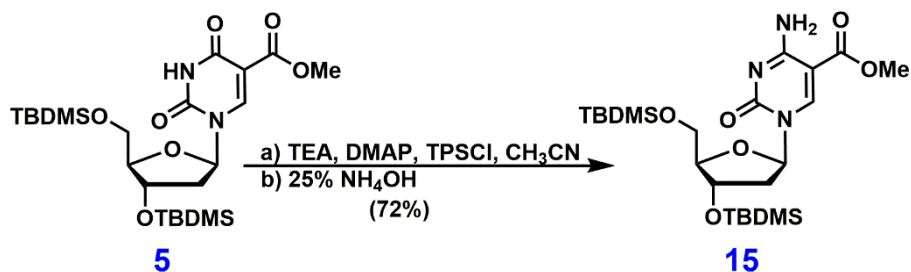

To a solution of **5** (258 mg, 0.50 mmol) in CH<sub>3</sub>CN (7.7 mL) were added TEA (157 mg, 1.55 mmol), DMAP (183 mg, 1.50 mmol) and TPSCI (454 mg, 1.50 mmol). The reaction was stirred at r.t. for 21 h before NH<sub>4</sub>OH (25%, 11 mL) was added. The reaction was kept stirring at r.t. for another 1.5 h. Solvent was removed under vacuum. The residue was partitioned between water and ethyl acetate. The aqueous layer was extracted with ethyl acetate 3 times. Combined organic layer was washed with sat. NaHCO<sub>3</sub>, brine and dried over Na<sub>2</sub>SO<sub>4</sub>. Crude product was purified

by column chromatography ( $\text{CH}_2\text{Cl}_2$  with 2~4% methanol) to afford **15**<sup>11</sup> (185 mg, 0.36 mmol, 72% yield) as a white foam.  $^1\text{H}$  NMR (300 MHz,  $\text{CD}_3\text{OD}$ )  $\delta$ : 8.65 (s, 1H), 6.09 (dd,  $J$  = 5.9, 7.4 Hz, 1H), 4.45 (m, 1H), 4.12 (m, 1H), 3.84 (m, 2H), 3.66 (s, 3H), 2.56 (m, 1H), 2.09 (m, 1H), 0.93 (s, 9H), 0.87 (s, 9H), 0.133 (s, 3H), 0.125 (s, 3H), 0.10 (s, 3H), 0.08 (s, 3H). HRMS ( $m/z$ ): calculated for  $\text{C}_{23}\text{H}_{44}\text{N}_3\text{O}_6\text{Si}_2$  ( $\text{M}+\text{H}$ ): 514.2763; found: 514.2760.

#### Synthesis of 16

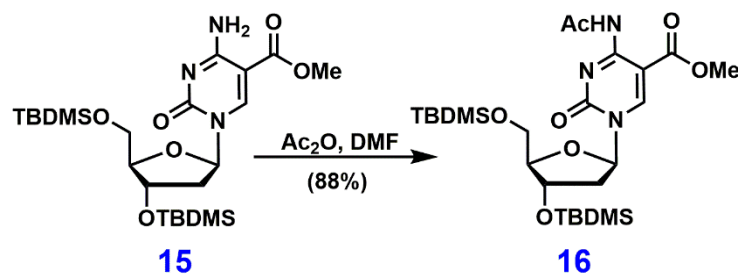

To a solution of **15** (185 mg, 0.36 mmol) in 2.3 mL of DMF was added  $\text{Ac}_2\text{O}$  (44 mg, 0.432 mmol). The reaction mixture was stirred at r.t. overnight. MeOH (0.5 mL) was added to quench the reaction. After the mixture was stirred for additional 15 min, the solvents were removed under reduced pressure. Crude product was purified by column chromatography ( $\text{CH}_2\text{Cl}_2$  with 10% methanol) to afford **16**<sup>11</sup> (176 mg, 0.317 mmol, 88% yield) as a white foam.  $^1\text{H}$  NMR (300 MHz,  $\text{CD}_3\text{OD}$ )  $\delta$ : 8.80 (s, 1H), 6.07 (dd,  $J$  = 6.1, 7.2 Hz, 1H), 4.46 (m, 1H), 4.17 (m, 1H), 3.85 (m, 2H), 3.78 (s, 3H), 2.65 (m, 1H), 2.53 (s, 3H), 2.17 (m, 1H), 0.94 (s, 9H), 0.87 (s, 9H), 0.14 (s, 3H), 0.13 (s, 3H), 0.10 (s, 3H), 0.08 (s, 3H). HRMS ( $m/z$ ): calculated for  $\text{C}_{25}\text{H}_{46}\text{N}_3\text{O}_7\text{Si}_2$  ( $\text{M}+\text{H}$ ): 556.2869; found: 556.2875.

#### Synthesis of 17

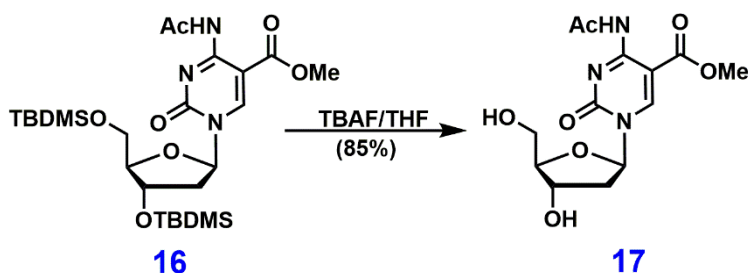

To a solution of **16** (176 mg, 0.317 mmol) in 0.5 mL of THF was added TBAF (1 M in THF, 0.793 mmol). The reaction was kept at r.t. and monitored by TLC. Upon completion (about 1h), solvent was removed under reduced pressure. Crude product was purified by column chromatography (CH<sub>2</sub>Cl<sub>2</sub> with 10% methanol) to afford **17**<sup>10</sup> (88 mg, 0.269 mmol, 85% yield) as a white foam. <sup>1</sup>H NMR (300 MHz, DMSO-*d*<sub>6</sub>)  $\delta$ : 10.63 (s, 1H), 9.22 (s, 1H), 0.04 (t, *J* = 5.7 Hz, 1H), 4.23 (m, 1H), 3.90 (m, 1H), 3.78 (s, 3H), 3.63 (m, 2H), 2.41 (s, 3H), 2.35 (m, 1H), 2.13 (m, 1H). HRMS (*m/z*): calculated for C<sub>13</sub>H<sub>18</sub>N<sub>3</sub>O<sub>7</sub> (M+H): 328.1139; found: 328.1144.

#### Synthesis of 5-cadC-CE phosphoramidite

5-cadC-CE phosphoramidite was synthesized as described previously.<sup>10</sup>

#### Synthesis of 5-hmdC-CE phosphoramidite

5-hmdC-CE phosphoramidite was synthesized as described previously.<sup>12</sup>

#### Synthesis of **18**

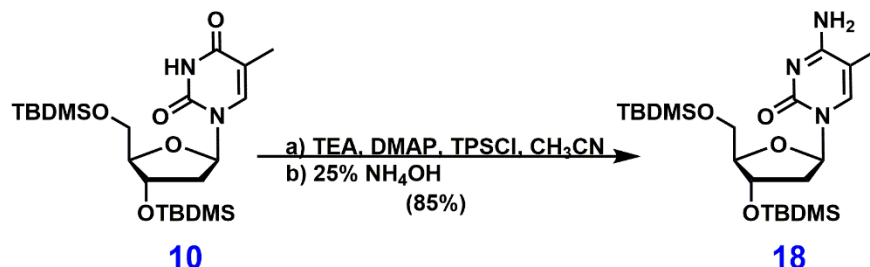

To a solution of **10** (600 mg, 1.276 mmol) in CH<sub>3</sub>CN (15 mL) were added TEA (407 mg, 4.02 mmol), DMAP (478 mg, 3.919 mmol) and TPSCI (1.16 g, 3.919 mmol). The reaction was stirred at r.t. for 21 h before NH<sub>4</sub>OH (25%, 15 mL) was added. The reaction was kept stirring at r.t. for another 1.5 h. Solvent was removed under vacuum. The residue was partitioned between water and ethyl acetate. The aqueous layer was extracted with ethyl acetate 3 times. Combined organic layer was washed with 5% NaHCO<sub>3</sub>, brine and dried over Na<sub>2</sub>SO<sub>4</sub>. Crude product was purified by column chromatography (CH<sub>2</sub>Cl<sub>2</sub> with 5% methanol) to afford **18** (509 mg, 1.09 mmol,

85% yield) as a white solid.  $^1\text{H}$  NMR (300 MHz,  $\text{CDCl}_3$ )  $\delta$ : 8.27 (s, 1H), 6.1 (t,  $J = 6.6$  Hz, 1H), 4.35 (m, 1H), 4.01 (m, 1H), 3.88 (dd,  $J = 2.5, 11.6$  Hz, 1H), 3.74 (dd,  $J = 2.5, 11.6$  Hz, 1H), 2.57 (m, 1H), 1.97 (m, 1H), 1.88 (s, 3H), 0.91 (s, 9H), 0.88 (s, 9H), 0.12 (s, 3H), 0.11 (s, 3H), 0.06 (s, 3H), 0.05 (s, 3H). HRMS ( $m/z$ ): calculated for  $\text{C}_{22}\text{H}_{44}\text{N}_3\text{O}_4\text{Si}_2$  ( $\text{M}+\text{H}$ ): 470.2865; found: 470.2867.

#### Synthesis of 19

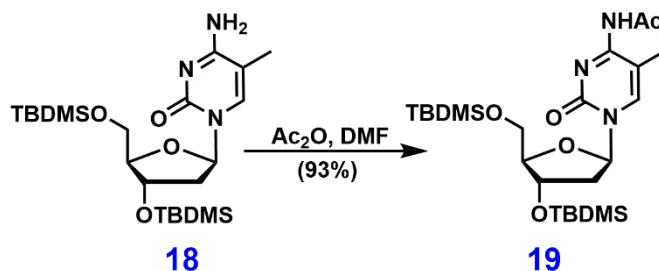

To a solution of **18** (250 mg, 0.533 mmol) in 2 mL of DMF was added  $\text{Ac}_2\text{O}$  (66 mg, 0.645 mmol). The reaction mixture was stirred at r.t. overnight. MeOH (1 mL) was added to quench the reaction. After the mixture was stirred for additional 15 min, the solvents were removed under reduced pressure. The residue was purified by column chromatography ( $\text{CH}_2\text{Cl}_2$  with 2% methanol) to afford **19** (253 mg, 0.496 mmol, 93% yield) as a white foam.  $^1\text{H}$  NMR (300 MHz,  $\text{CDCl}_3$ )  $\delta$ : 8.25 (s, 1H), 6.15 (t,  $J = 6.4$  Hz, 1H), 4.34 (m, 1H), 4.04 (m, 1H), 3.90 (m, 1H), 3.74 (m, 1H), 2.63 (m, 1H), 2.30 (s, 3H), 2.06 (m, 1H), 1.89 (s, 3H), 0.87 (s, 9H), 0.86 (s, 9H), 0.09 (s, 3H), 0.08 (s, 3H), 0.06 (s, 3H), 0.04 (s, 3H). HRMS ( $m/z$ ): calculated for  $\text{C}_{24}\text{H}_{46}\text{N}_3\text{O}_5\text{Si}_2$  ( $\text{M}+\text{H}$ ): 512.2971; found: 512.2976.

#### Synthesis of 20

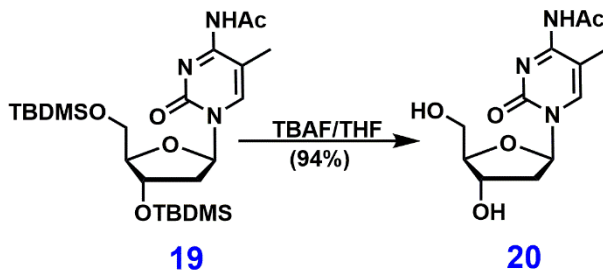

To a solution of **19** (250 mg, 0.489 mmol) in 1 mL of THF was added TBAF (1 M in THF, 1.22 mmol). The reaction was kept at r.t. and monitored by TLC. Upon completion (about 1h), solvent was removed under reduced pressure. Crude product was purified by column chromatography (CH<sub>2</sub>Cl<sub>2</sub> with 10% methanol) to afford **20** (130 mg, 0.46 mmol, 94% yield) as a white foam. <sup>1</sup>H NMR (300 MHz, CD<sub>3</sub>OD) δ: 7.95 (d, *J* = 1.1 Hz, 1H), 6.29 (t, *J* = 6.2 Hz, 1H), 4.38 (m, 1H), 3.91 (m, 1H), 3.75 (m, 1H), 2.38 (s, 3H), 2.24 (m, 2H), 1.92 (d, *J* = 1.1 Hz, 3H). HRMS (*m/z*): calculated for C<sub>12</sub>H<sub>18</sub>N<sub>3</sub>O<sub>5</sub> (M+H): 284.1241; found: 284.1242.

#### *Synthesis of 5-mdC-CE phosphoramidite*

5-mdC-CE phosphoramidite was synthesized as described previously.<sup>13</sup>

**Figure S1.** Substrate selectivity of recombinant eUDG (A), hTDG (B), hSMUG1 (C) and hMBD4 (D).

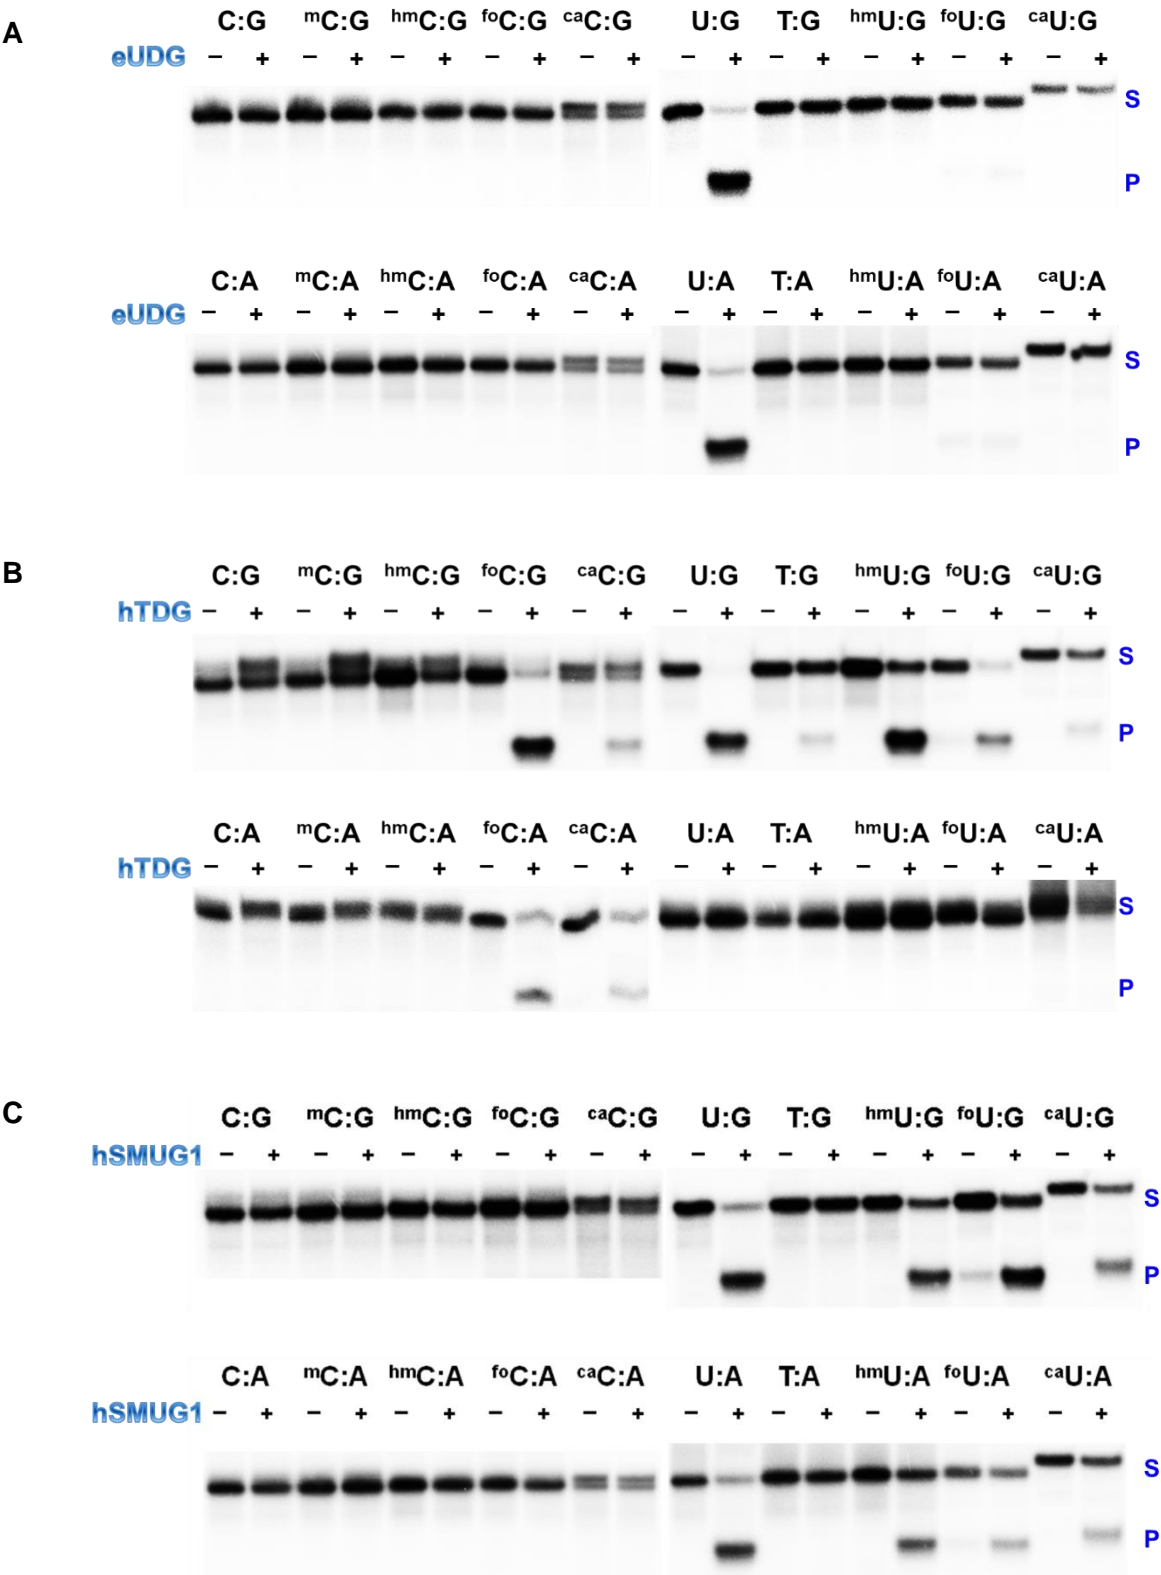

D

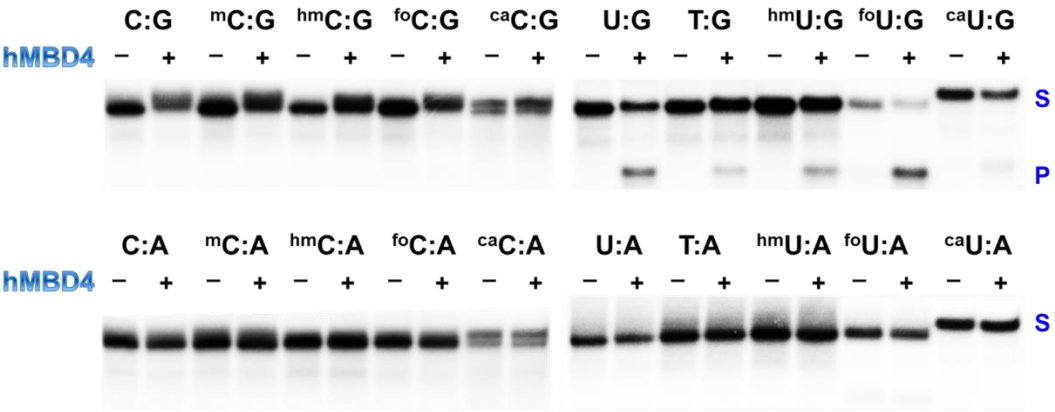

**Figure S2.** DNA glycosylase activity in HeLa (A), U87 (B) and hES (C) cell extracts.

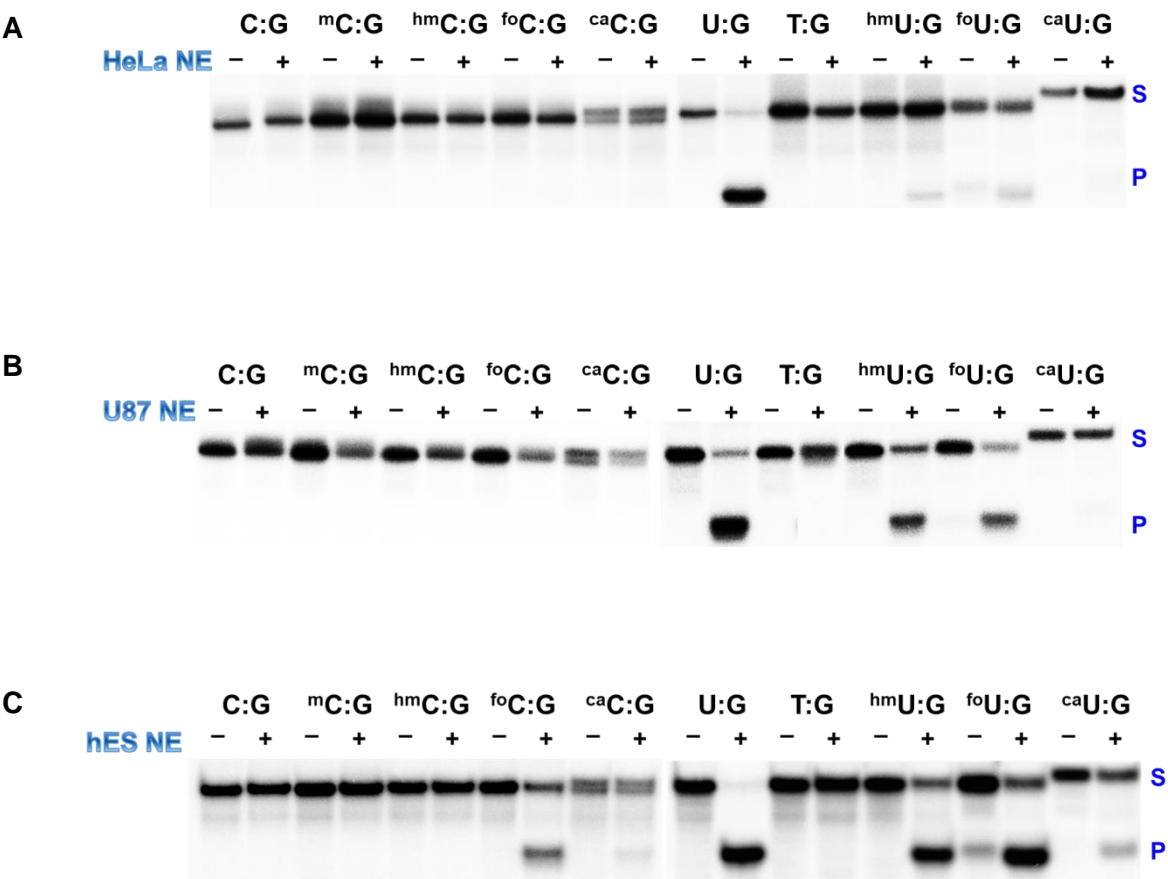

**Table S1.** Sequence, theoretical mass and experimentally determined mass for ODNs used in the current study.

| Name            | Sequence                                                    | [M+H] <sup>+</sup><br>(expected) | [M+H] <sup>+</sup><br>(detected) |
|-----------------|-------------------------------------------------------------|----------------------------------|----------------------------------|
| 24mer-C         | 5'-GGCTATCGTGGC <sup>C</sup> GGCCACGACGG-3'                 | 7396.8150                        | 7397.1624                        |
| 24mer-mC        | 5'-GGCTATCGTGGC <sup>m</sup> C <sup>C</sup> GGCCACGACGG-3'  | 7410.8422                        | 7410.8543                        |
| 24mer-hmC       | 5'-GGCTATCGTGGC <sup>hm</sup> C <sup>C</sup> GGCCACGACGG-3' | 7426.8409                        | 7426.9180                        |
| 24mer-foC       | 5'-GGCTATCGTGGC <sup>fo</sup> C <sup>C</sup> GGCCACGACGG-3' | 7424.8252                        | 7425.3954                        |
| 24mer-caC       | 5'-GGCTATCGTGGC <sup>ca</sup> C <sup>C</sup> GGCCACGACGG-3' | 7440.8236                        | 7440.9183                        |
| 24mer-U         | 5'-GGCTATCGTGGC <sup>U</sup> GGCCACGACGG-3'                 | 7397.7990                        | 7398.7812                        |
| 24mer-T         | 5'-GGCTATCGTGGC <sup>T</sup> GGCCACGACGG-3'                 | 7411.8260                        | 7413.2112                        |
| 24mer-hmU       | 5'-GGCTATCGTGGC <sup>hm</sup> U <sup>U</sup> GGCCACGACGG-3' | 7427.8249                        | 7427.9502                        |
| 24mer-foU       | 5'-GGCTATCGTGGC <sup>fo</sup> U <sup>U</sup> GGCCACGACGG-3' | 7425.8089                        | 7425.9761                        |
| 24mer-caU       | 5'-GGCTATCGTGGC <sup>ca</sup> U <sup>U</sup> GGCCACGACGG-3' | 7441.8078                        | 7441.9971                        |
| Complementary-G | 5'-CCGTGGTCGCCG <sup>G</sup> CCACGATAGCC-3'                 | 7316.7933                        | 7316.8995                        |
| Complementary-A | 5'-CCGTCTGTGGCCG <sup>A</sup> CCACGATAGCC-3'                | 7300.7934                        | 7300.9025                        |

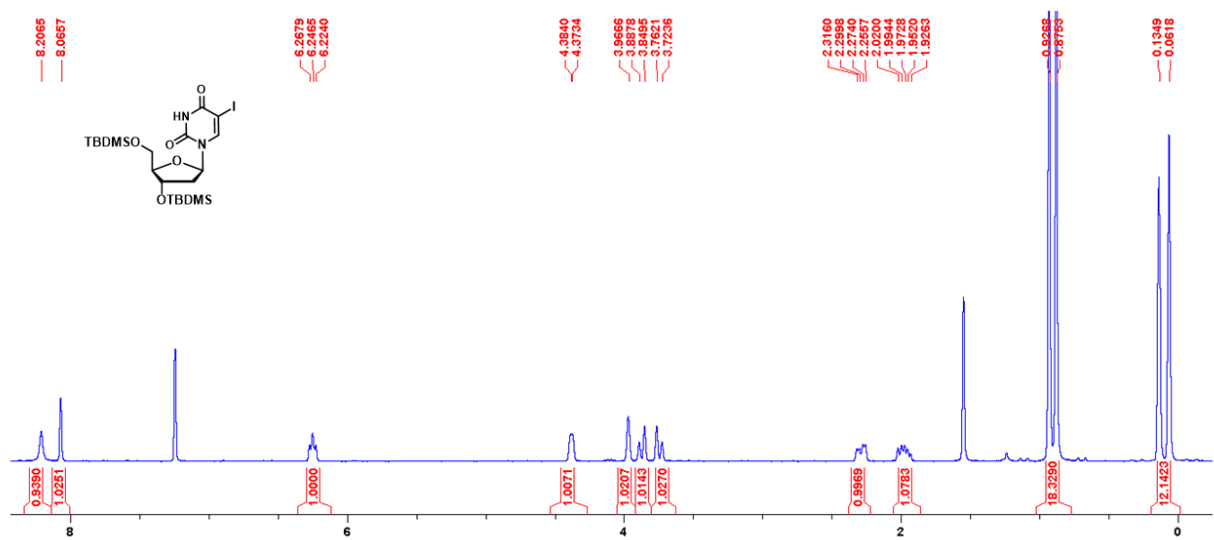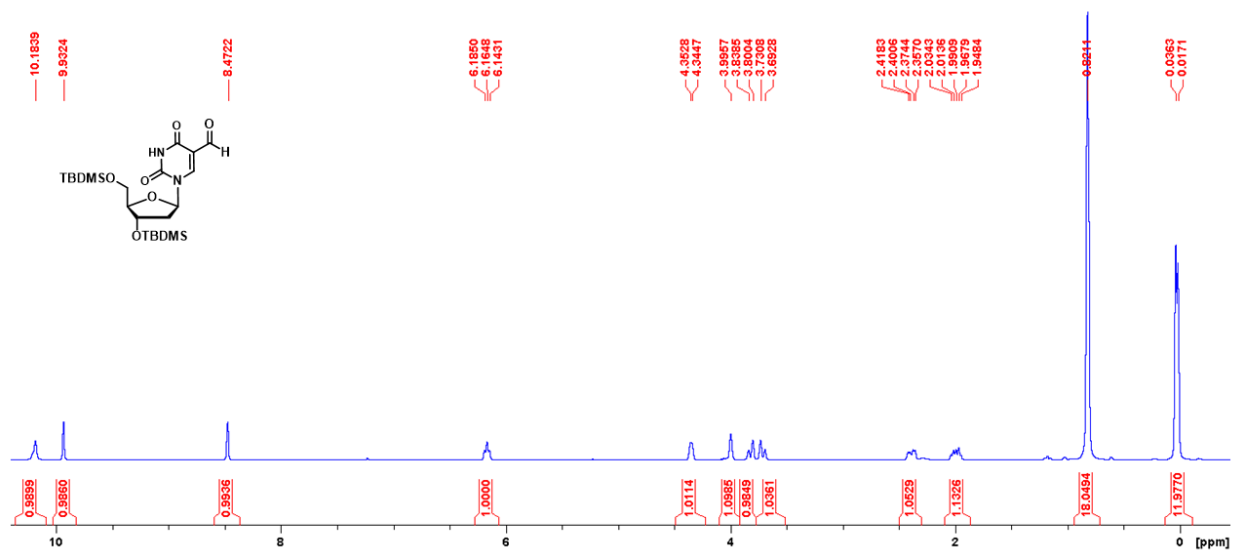

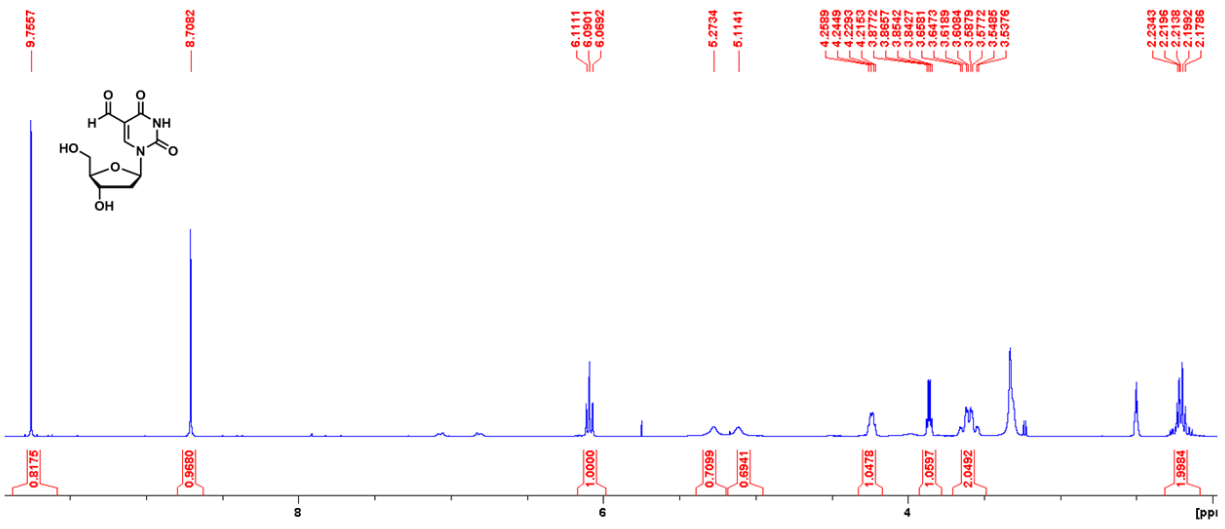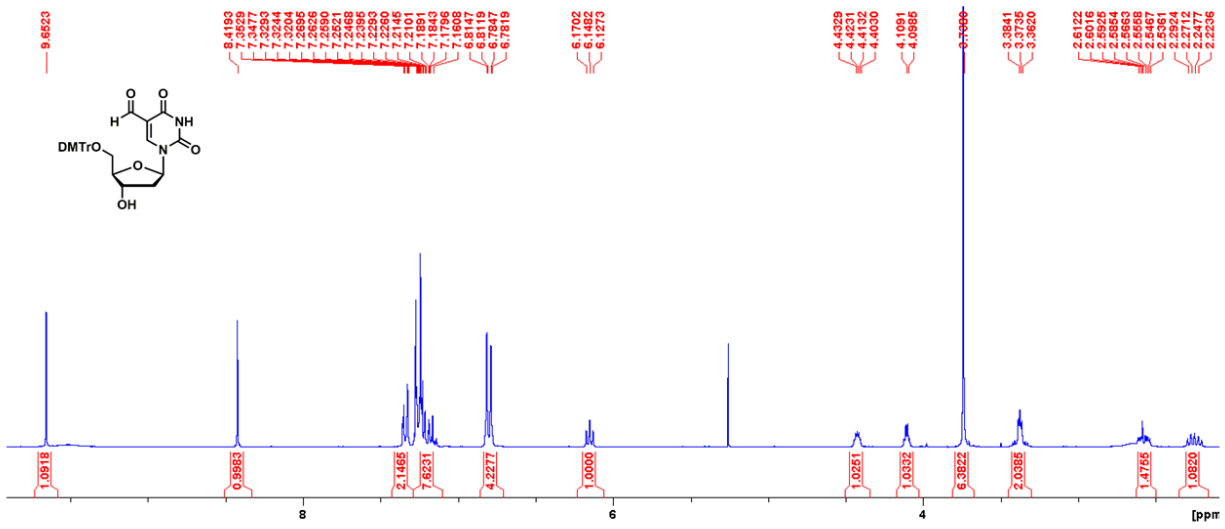

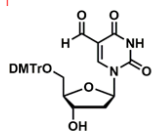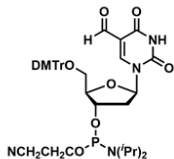

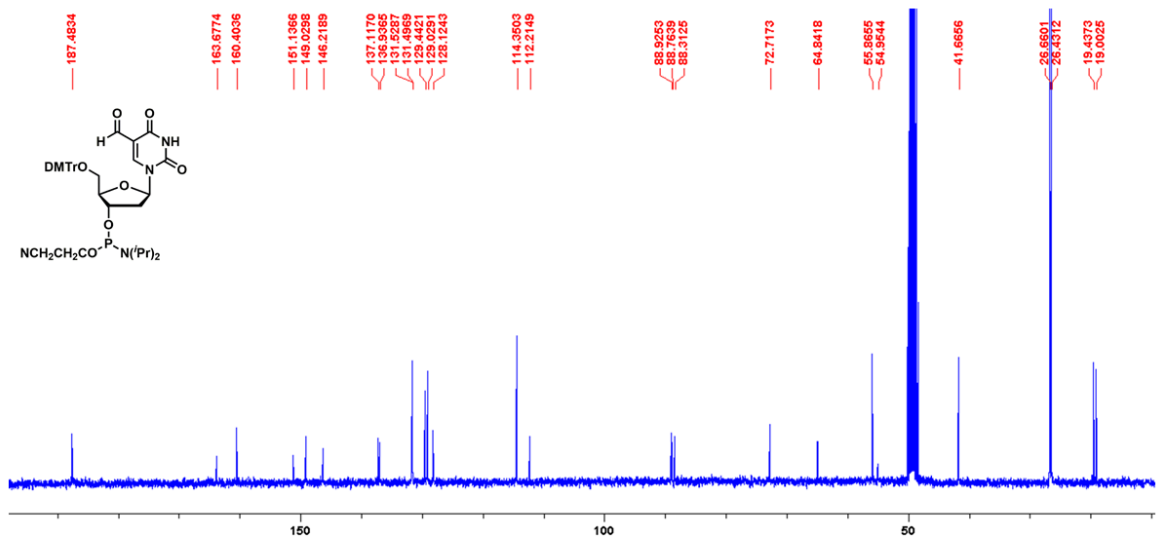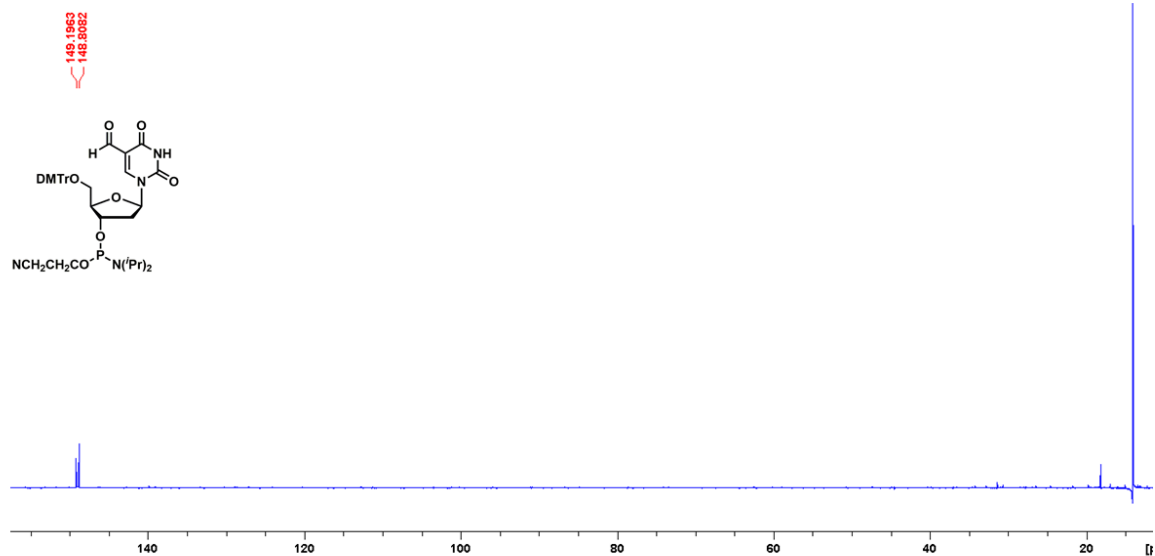

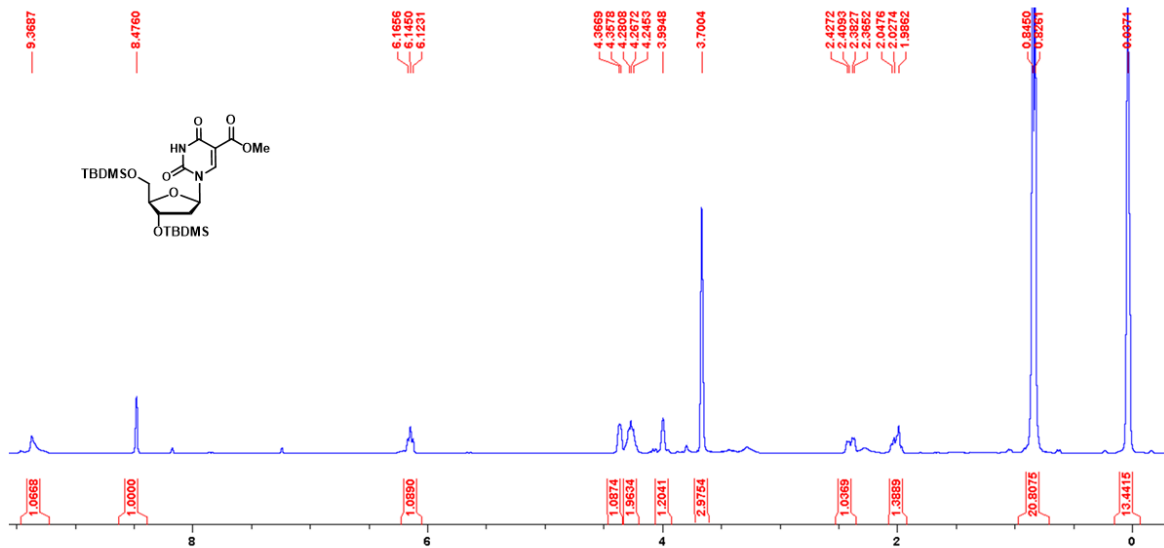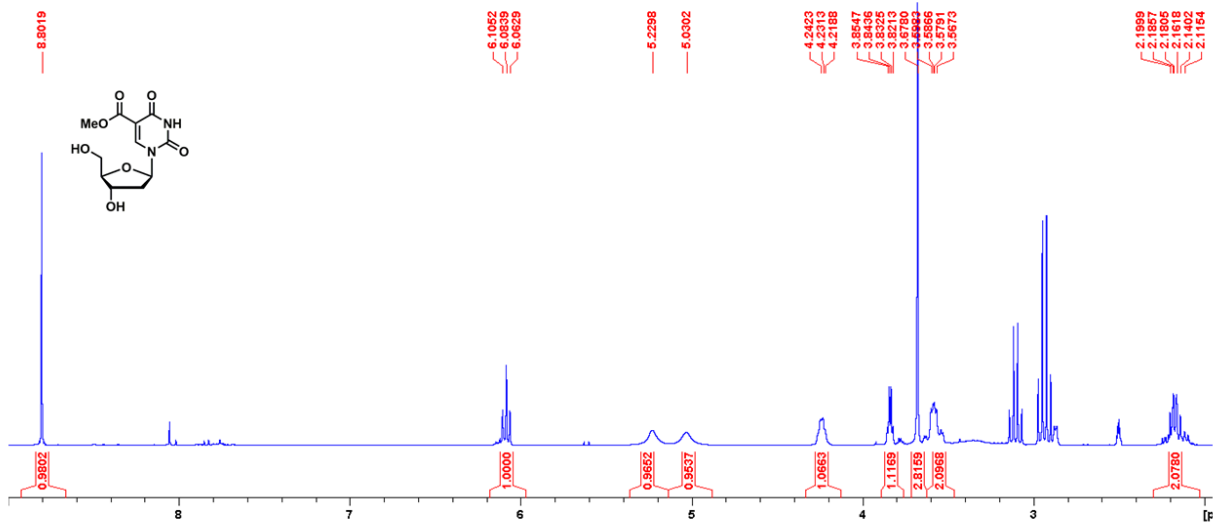

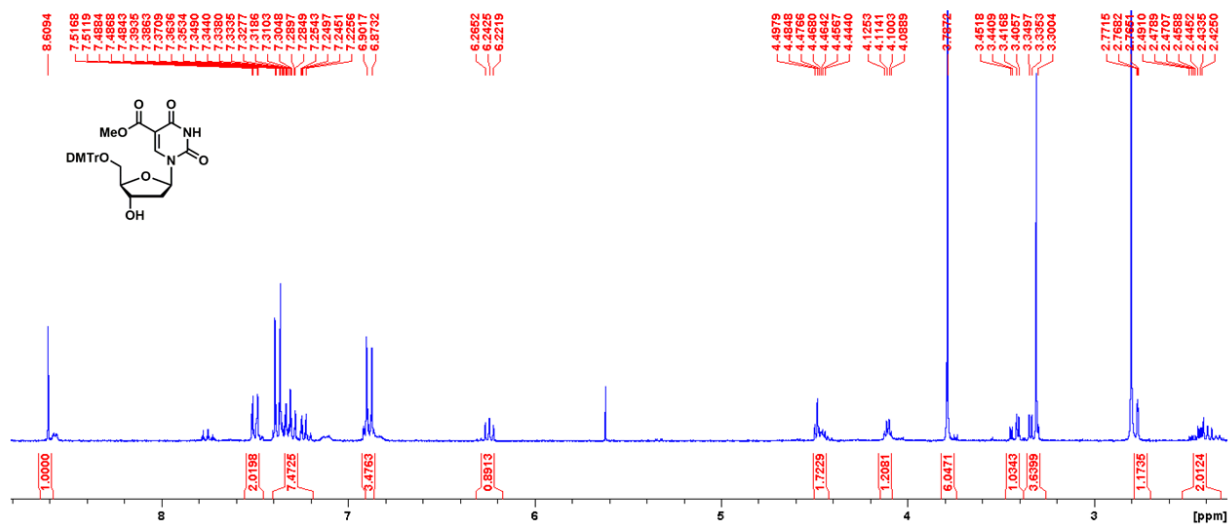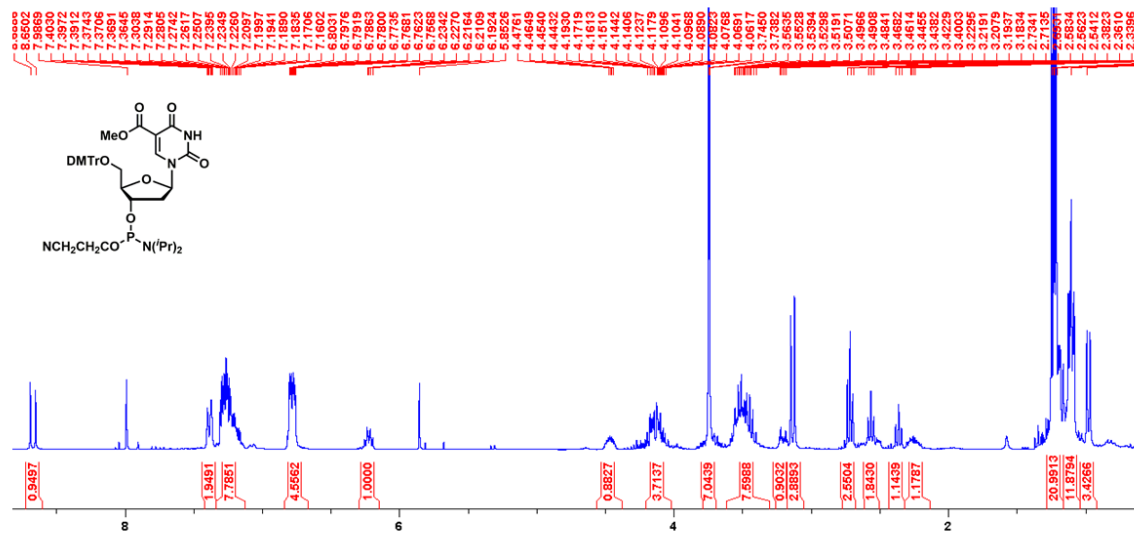

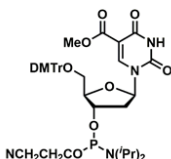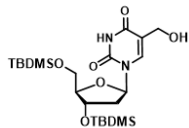

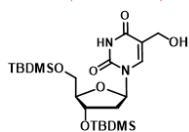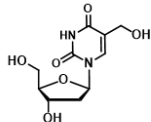

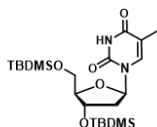

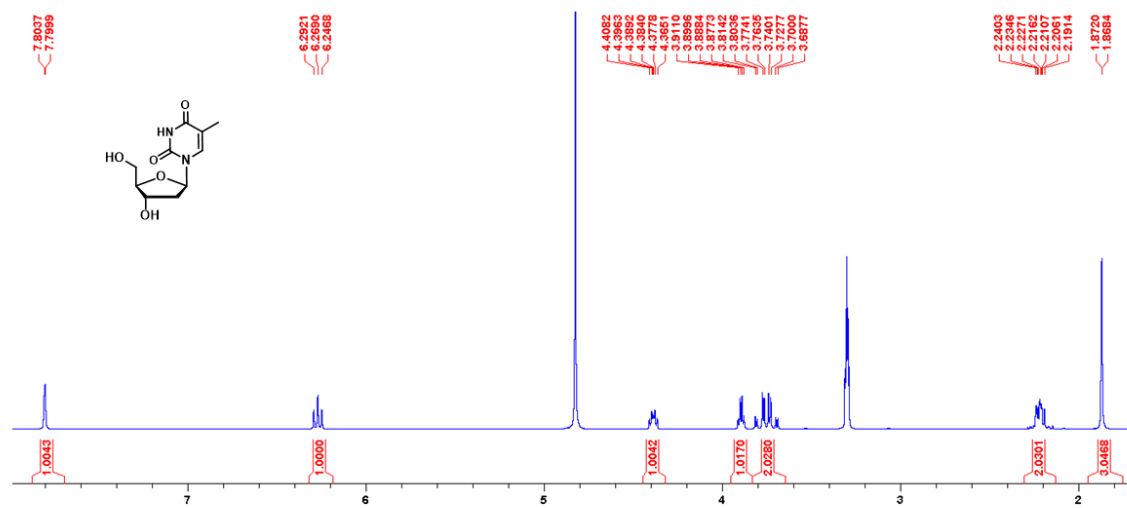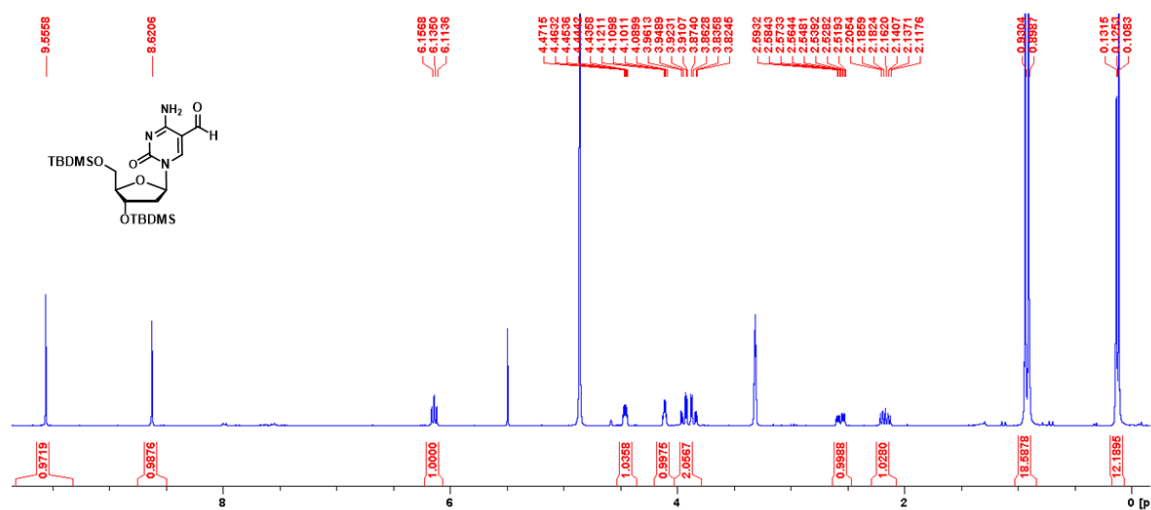

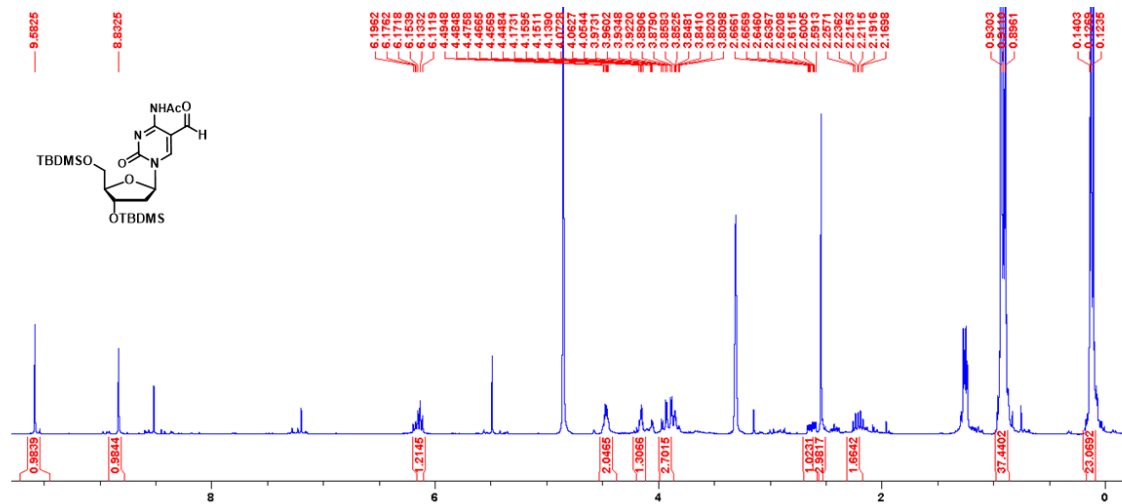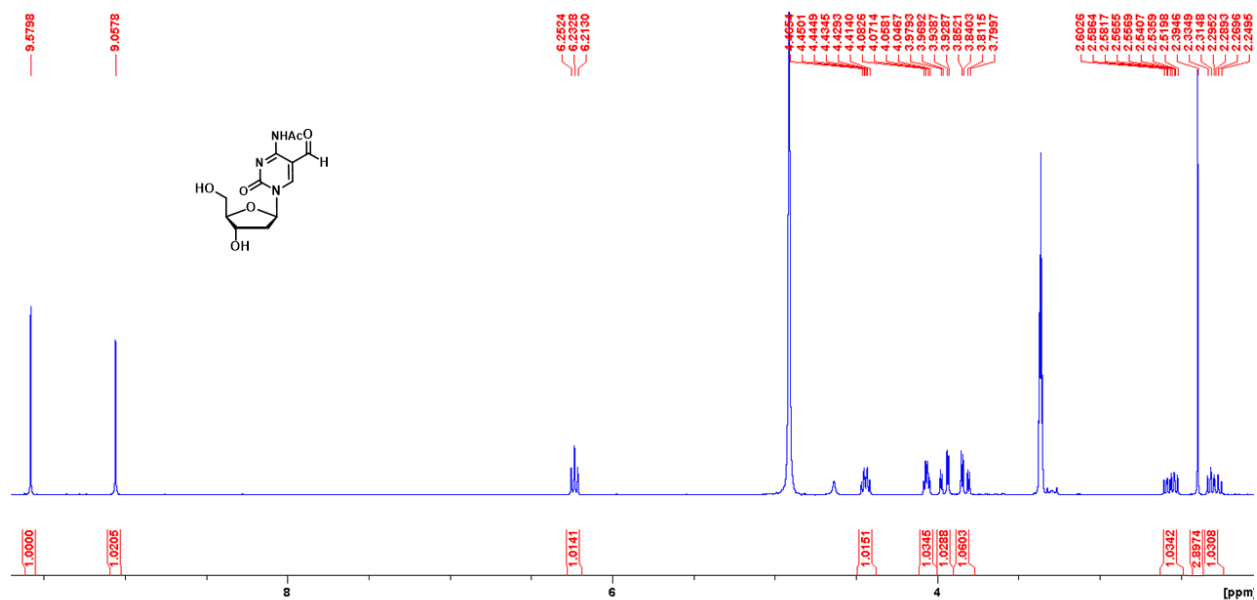

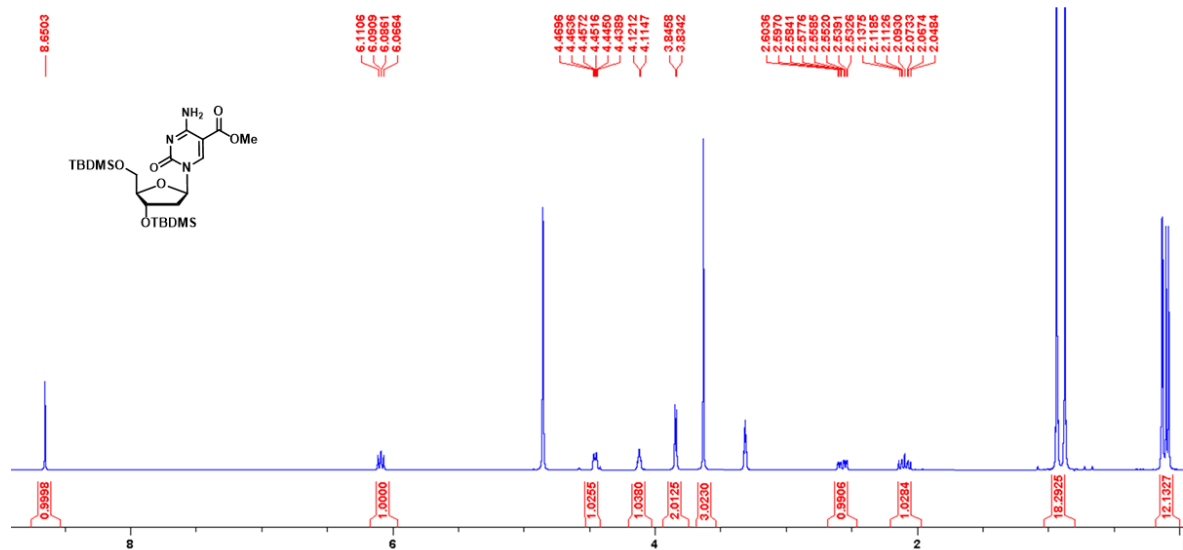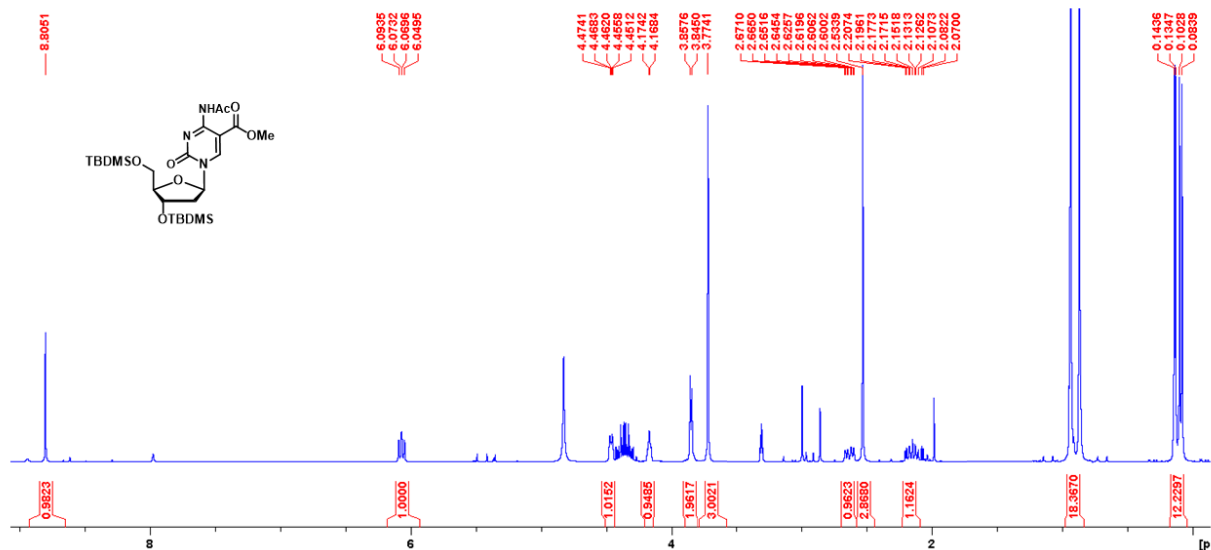

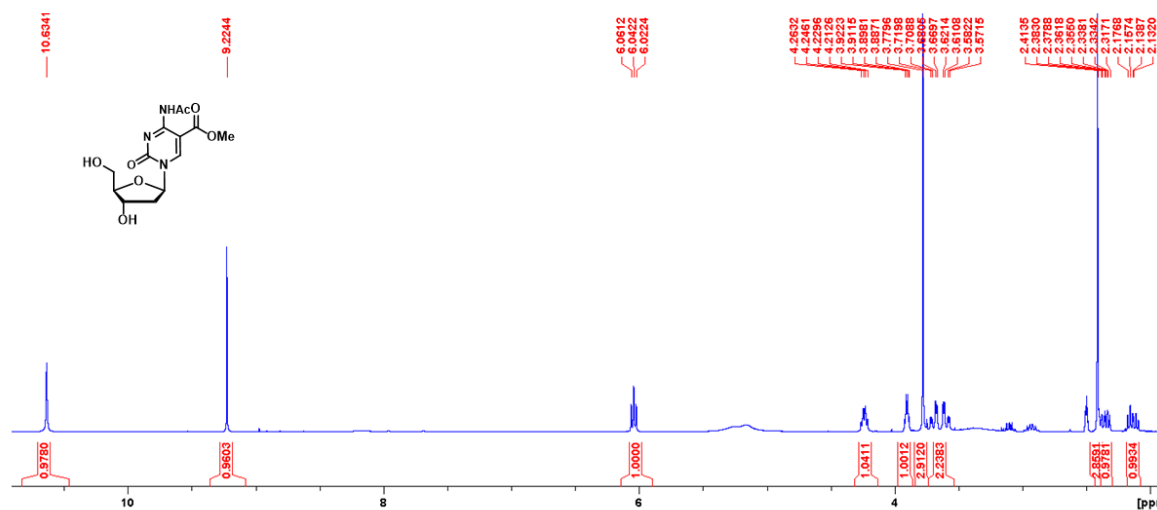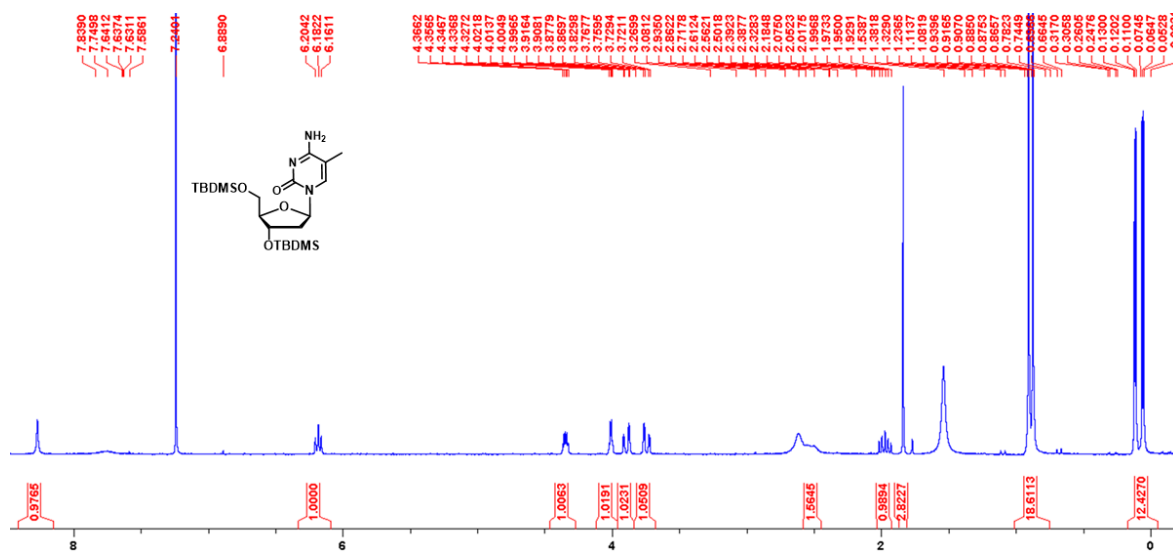

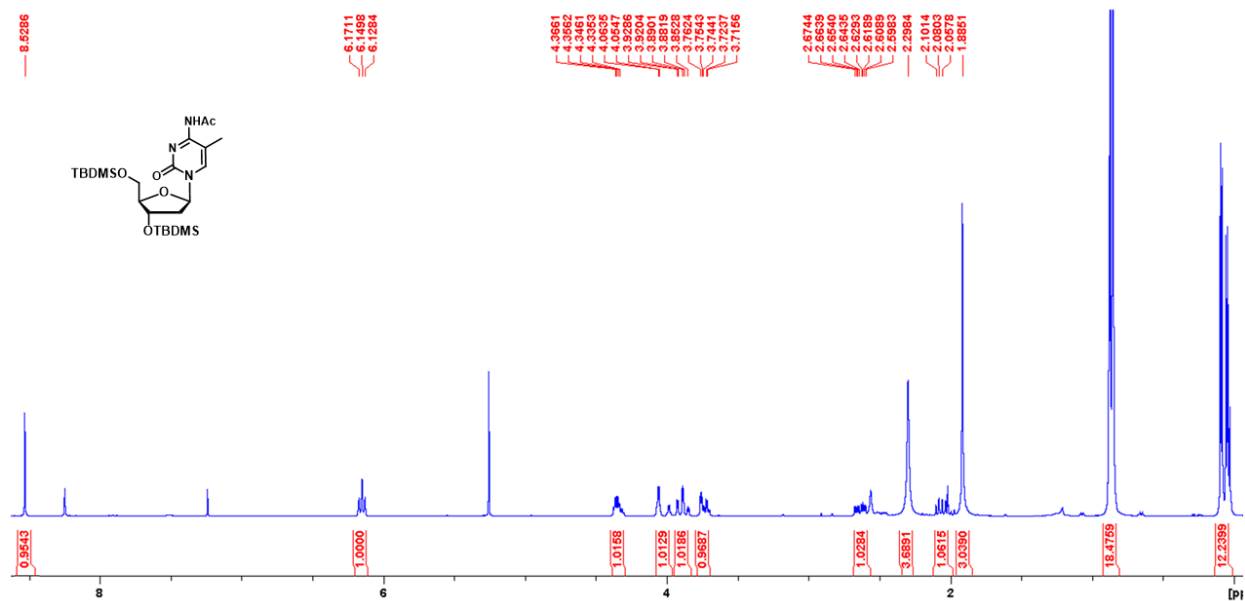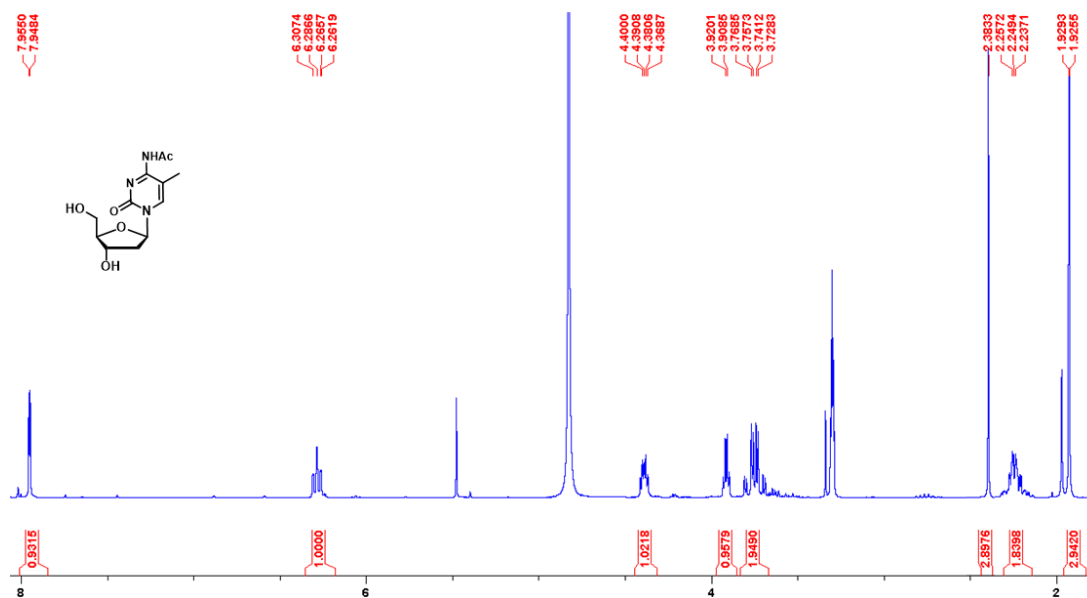

## Reference

1. Y. El Safadi, J. C. Paillart, G. Laumond, A. M. Aubertin, A. Burger, R. Marquet and V. Vivet-Boudou, *J Med Chem*, 2010, **53**, 1534-1545.
2. K. Sato, W. Hirose and A. Matsuda, *Curr Protoc Nucleic Acid Chem*, 2008, **Chapter 1**, Unit 1 21.
3. A. Ono, N. Haginoya, M. Kiyokawa, N. Minakawa and A. Matsuda, *Bioorganic & Medicinal Chemistry Letters*, 1994, **4**, 361-366.
4. N. Haginoya, A. Ono, Y. Nomura, Y. Ueno and A. Matsuda, *Bioconjug Chem*, 1997, **8**, 271-280.
5. L. C. Sowers and G. P. Beardsley, *The Journal of Organic Chemistry*, 1993, **58**, 1664-1665.
6. M. Aso, T. Kaneko, M. Nakamura, N. Koga and H. Suemune, *Chem Commun (Camb)*, 2003, DOI: 10.1039/b301425h, 1094-1095.
7. P. Herdewijn, L. Kerremans, P. Wigerinck, F. Vandendriessche and A. Van Aerschot, *Tetrahedron Letters*, 1991, **32**, 4397-4400.
8. J. Nielsen, M. Taagaard, J. E. Marugg, J. H. van Boom and O. Dahl, *Nucleic Acids Res*, 1986, **14**, 7391-7403.
9. M. Munzel, D. Globisch, C. Trindler and T. Carell, *Org Lett*, 2010, **12**, 5671-5673.
10. Q. Dai and C. He, *Org Lett*, 2011, **13**, 3446-3449.
11. M. Munzel, U. Lischke, D. Stathis, T. Pfaffeneder, F. A. Gnerlich, C. A. Deiml, S. C. Koch, K. Karaghiosoff and T. Carell, *Chemistry*, 2011, **17**, 13782-13788.
12. S. Tardy-Planechaud, J. Fujimoto, S. S. Lin and L. C. Sowers, *Nucleic Acids Res*, 1997, **25**, 553-559.
13. W. L. Sung, *Nucleic Acids Res*, 1981, **9**, 6139-6151.
